# Supplementary material for: Hydroxylated BiFeO3 as efficient fillers in poly(vinylidene fluoride) for flexible dielectric, ferroelectric, energy storage and mechanical energy harvesting application
Source: Royal Society of Chemistry journal article supplement (doi:10.1039/d0dt04017g), 2021-01-01
Supplement: d0dt04017g1.pdf [file d0dt04017g1.pdf]

**ELECTRONIC SUPPLEMENTARY INFORMATION (ESI)**

**Title: Hydroxylated BiFeO<sub>3</sub> as efficient fillers in poly(vinylidene fluoride) for flexible dielectric, ferroelectric, energy storage and mechanical energy harvesting application**

Abhishek Sasmal<sup>1</sup>, Aniket Patra<sup>2</sup>, P. Sujatha Devi<sup>3,\*</sup>, Shrabanee Sen<sup>1,\*</sup>

<sup>1</sup>Functional Materials and Devices Division, CSIR-Central Glass & Ceramic Research

Institute, Kolkata-700032, India

<sup>2</sup>Electrical and Communication Engineering, Indian Institute of Science, Bangalore-560012,

India

<sup>3</sup>Chemical Sciences and Technology Division, CSIR-National Institute for Interdisciplinary

Science and Technology, Thiruvananthapuram-695019, India

\*E-mail:

P. Sujatha Devi ([psujathadevi@niist.res.in](mailto:psujathadevi@niist.res.in))

Shrabanee Sen ([shrabanee@cgcric.res.in](mailto:shrabanee@cgcric.res.in))

**Fig. S1**

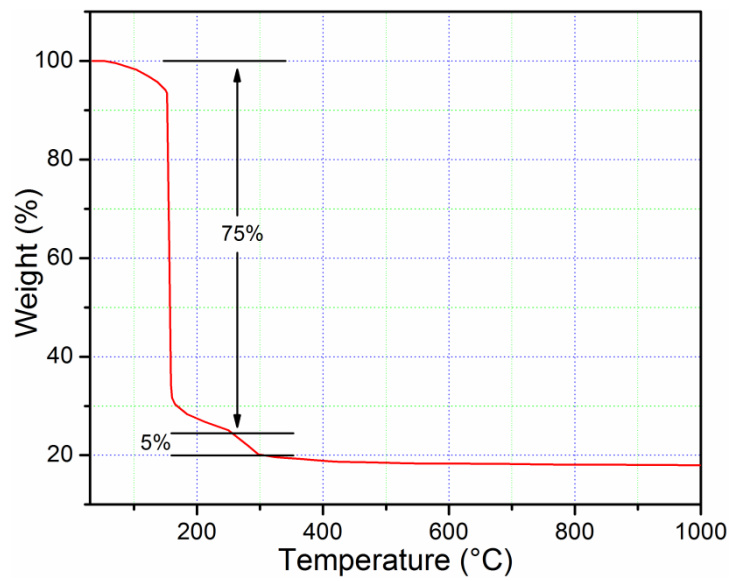

**Fig. S1** TGA plot of the as synthesized dried gel of BFO.

**Fig: S2**

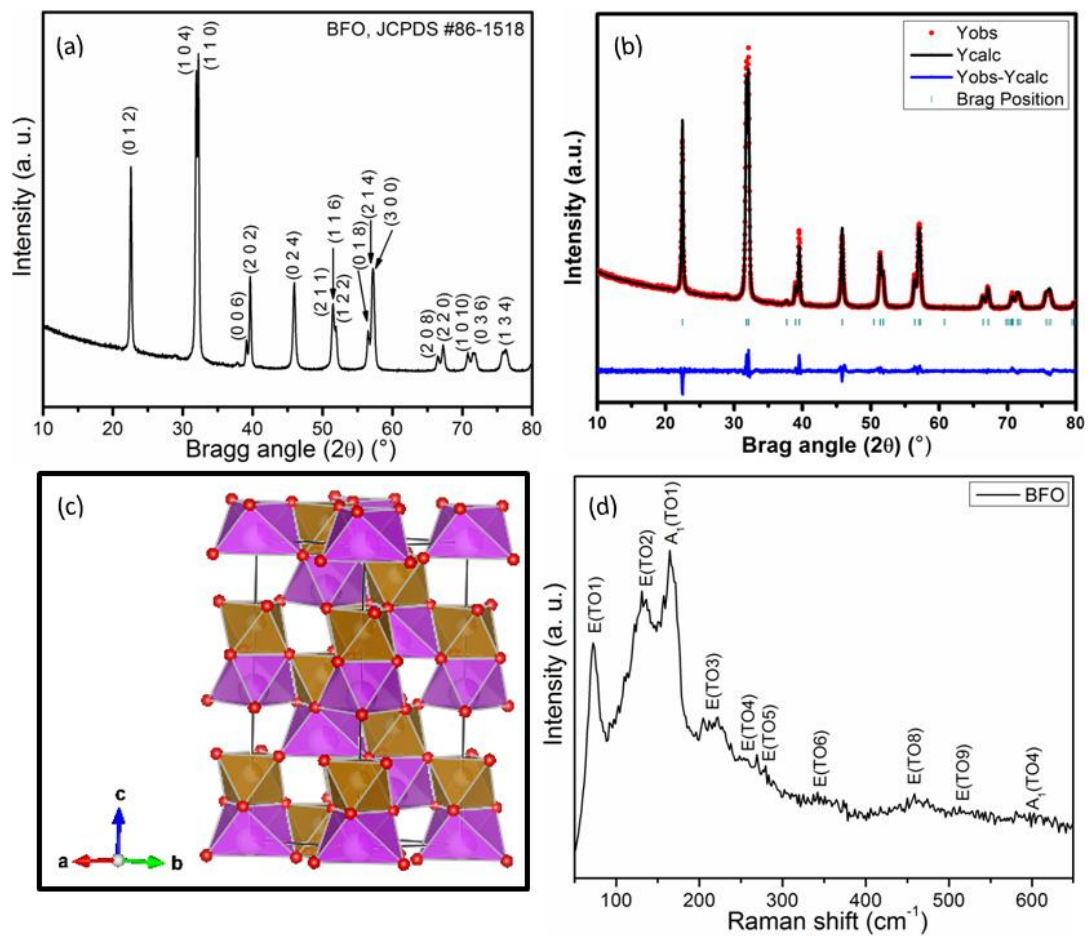

**Fig. S2** (a) Indexed and (b) refined XRD pattern of the prepared BFO nanoparticles. (c) Crystallographic structure of the BFO nanoparticles. (d) Room temperature Raman spectra of BFO nanoparticles.

**Table S1****Table S1** Refined lattice parameters and structure fitting factors.

| Sample ID                     | BFO                    |
|-------------------------------|------------------------|
| Space group                   | R3c                    |
| Lattice Parameters            |                        |
| a (Å)                         | 5.5769                 |
| c (Å)                         | 13.8647                |
| Cell Volume (Å <sup>3</sup> ) | 373.448                |
| Atomic positions              |                        |
| Bi (x, y, z) (6a)             | 0, 0, 0                |
| Fe (x, y, z) (6a)             | 0, 0, 0.2217           |
| O (x, y, z) (18b)             | 0.4297, 0.0070, 0.9546 |
| Fitting factors               |                        |
| R <sub>p</sub> (%)            | 12.1                   |
| R <sub>wp</sub> (%)           | 10.4                   |
| χ <sup>2</sup>                | 2.42                   |
| Selected bond lengths (Å)     |                        |
| Fe-O                          | 1.9273                 |
| Fe-O                          | 2.1430                 |
| Selected bond angles (°)      |                        |
| Fe-O-Fe                       | 153.6158               |

**Fig. S3**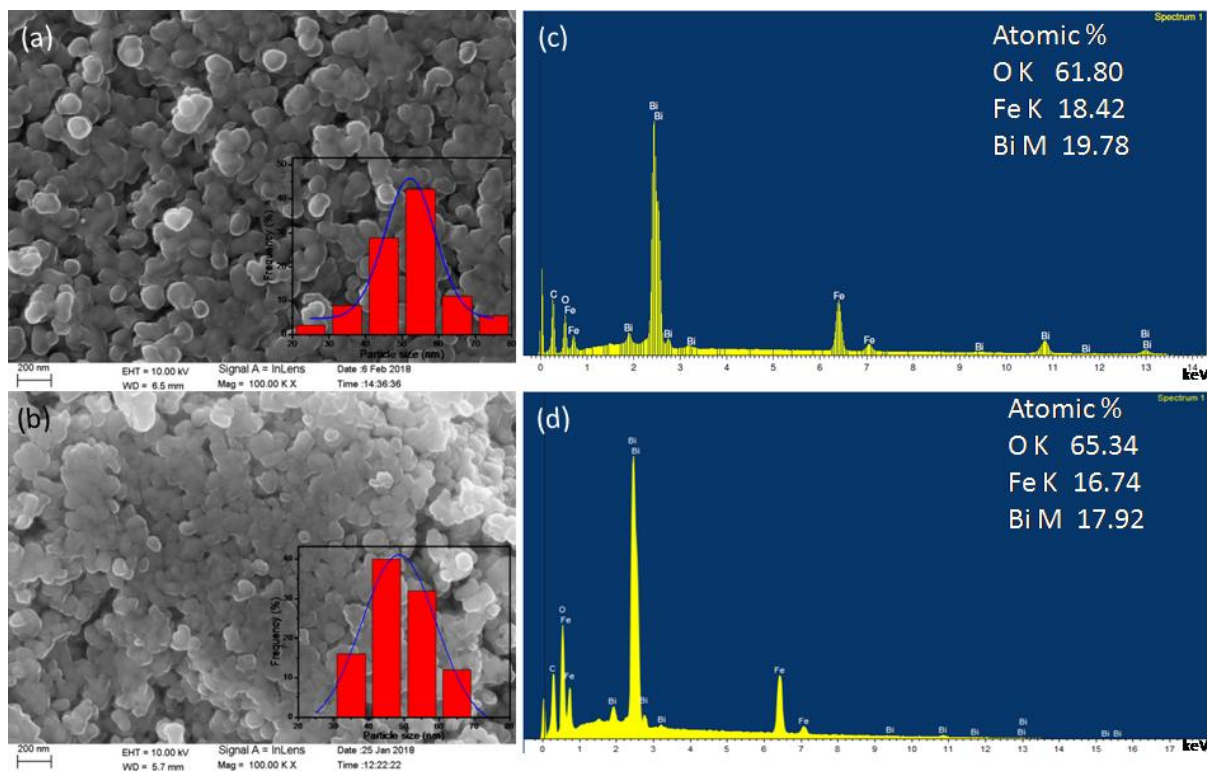**Fig. S3** (a-b) FESEM image (inset: particle size distribution) and (c-d) EDS spectra of BFO and BFOH nanoparticles, respectively.

**Fig. S4**

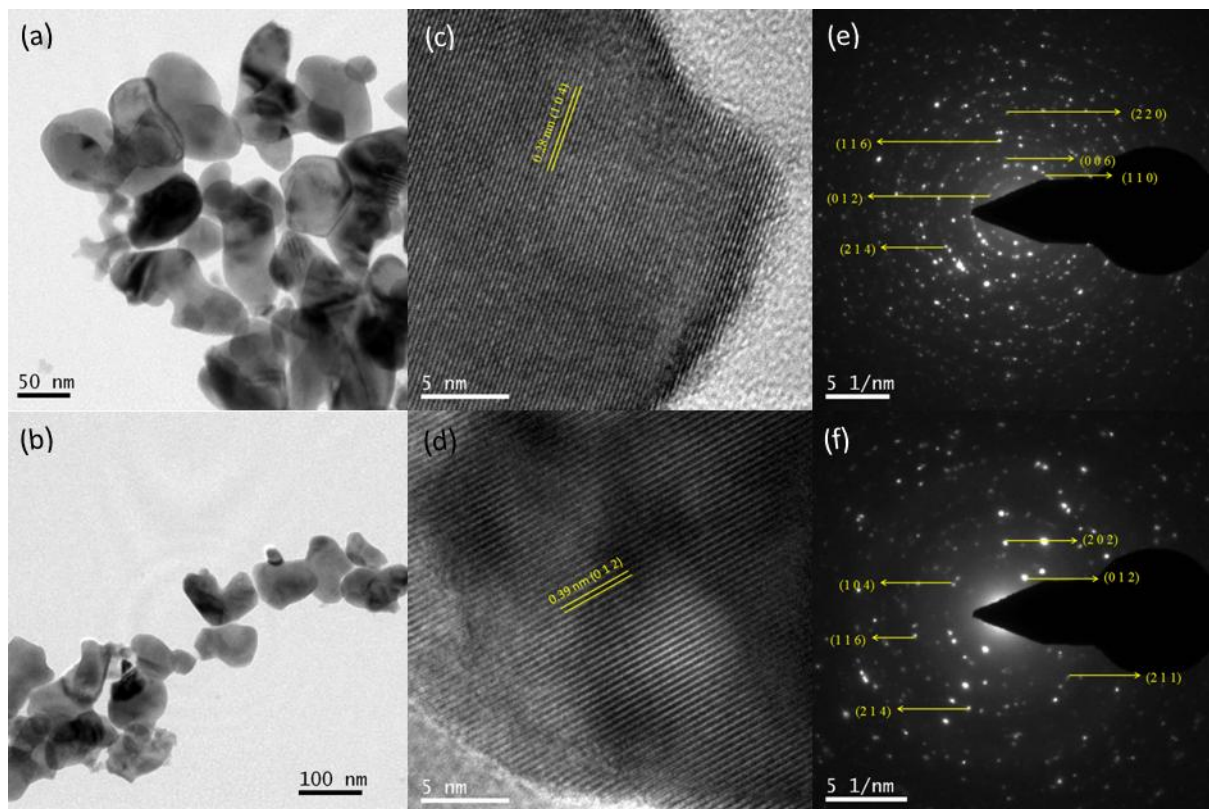

**Fig. S4** (a-b) Bright field TEM images (c-d) HRTEM images and (e-f) SAED patterns of BFO and BFOH nanoparticles, respectively.

**Fig. S5**

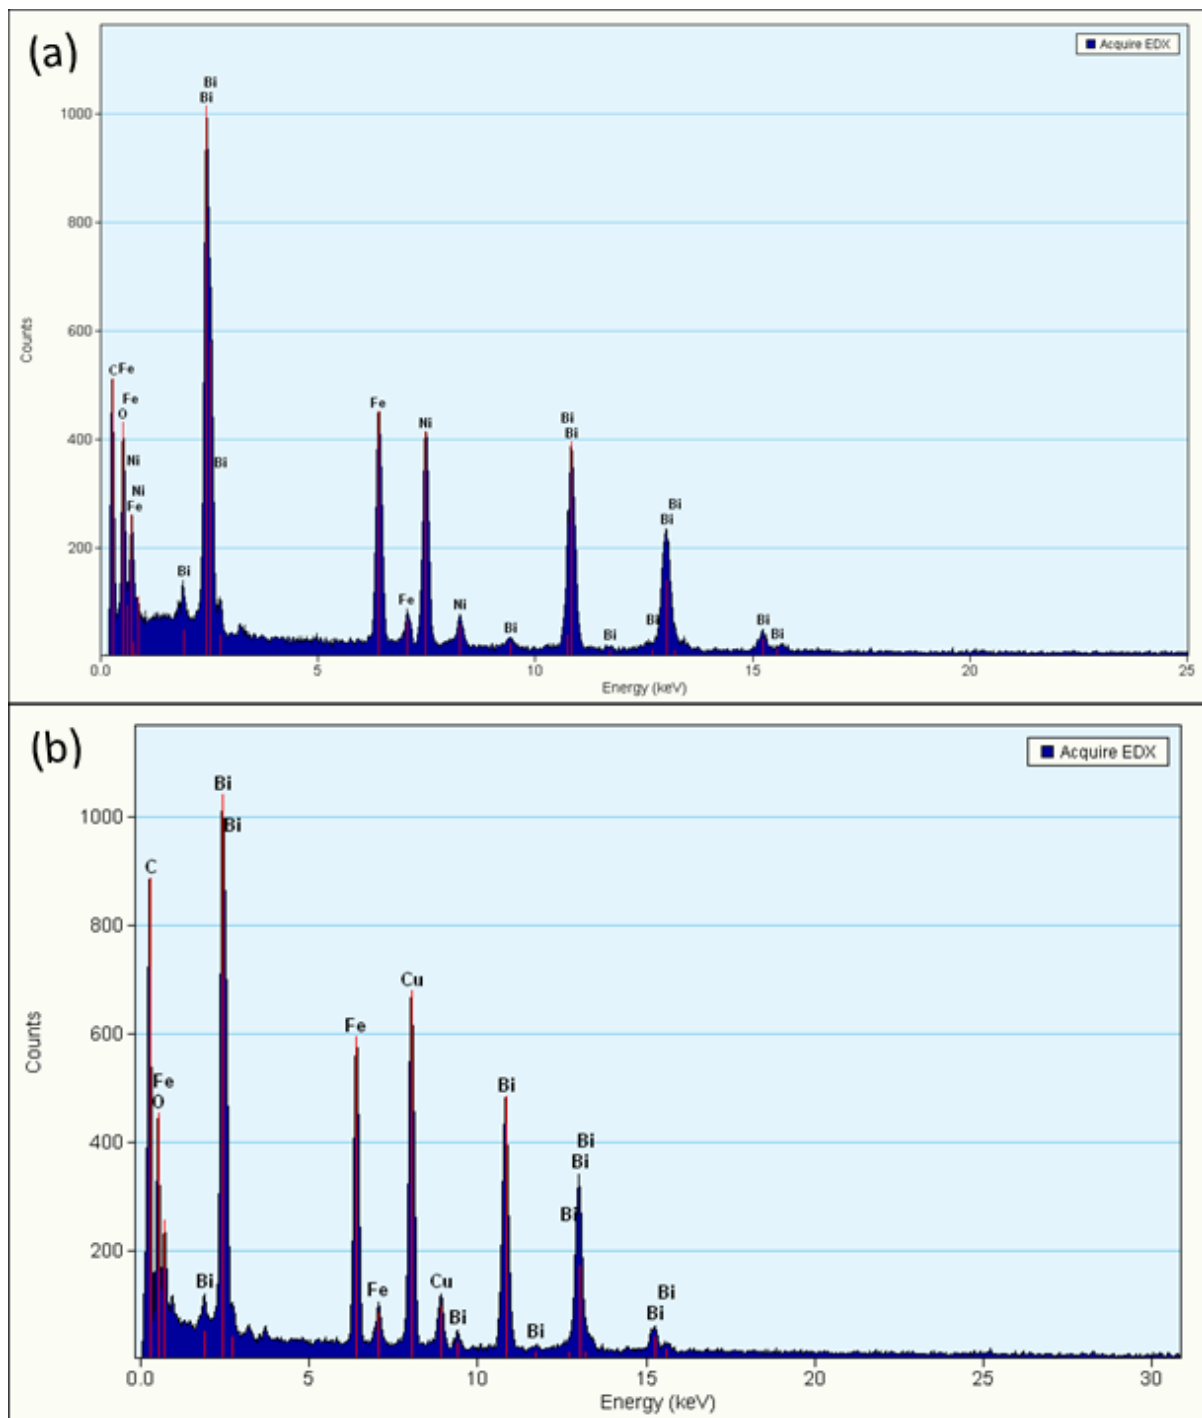

**Fig. S5** EDS spectra of (a) BFO and (b) BFOH nanoparticles.

**Fig. S6**

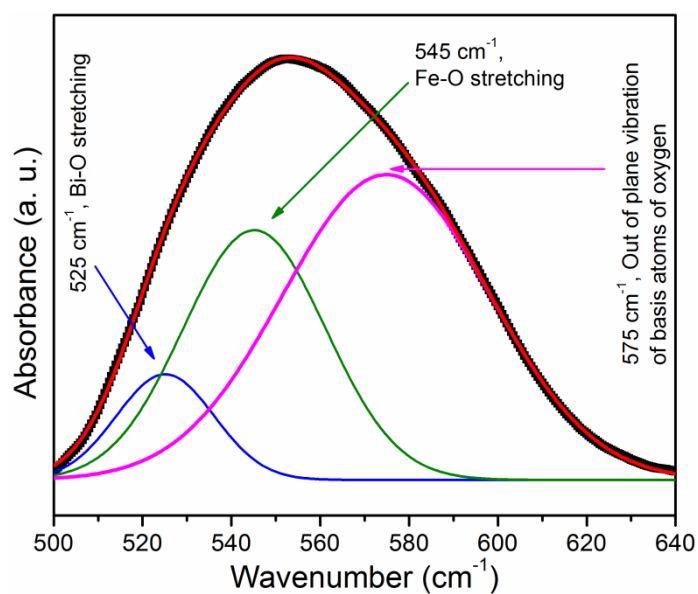

**Fig. S6** Deconvoluted FTIR absorption band of BFO nanoparticles around 555 cm<sup>-1</sup>.

**Fig. S7**

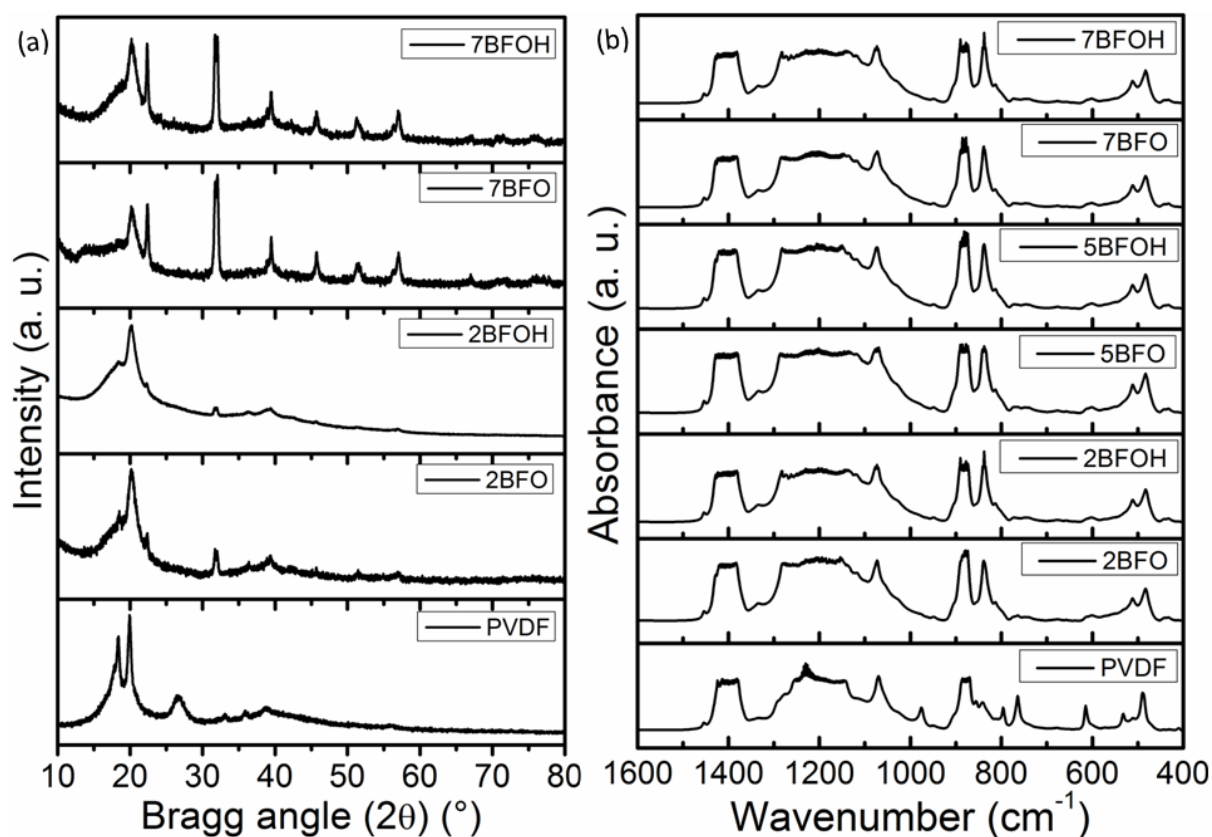

**Fig. S7** (a) XRD patterns (with 2θ ranging from 10 to 80°) and (b) FTIR absorption spectra (with wavenumber ranging from 1600-400 cm<sup>-1</sup>) of all the composite films.

**Fig. S8**

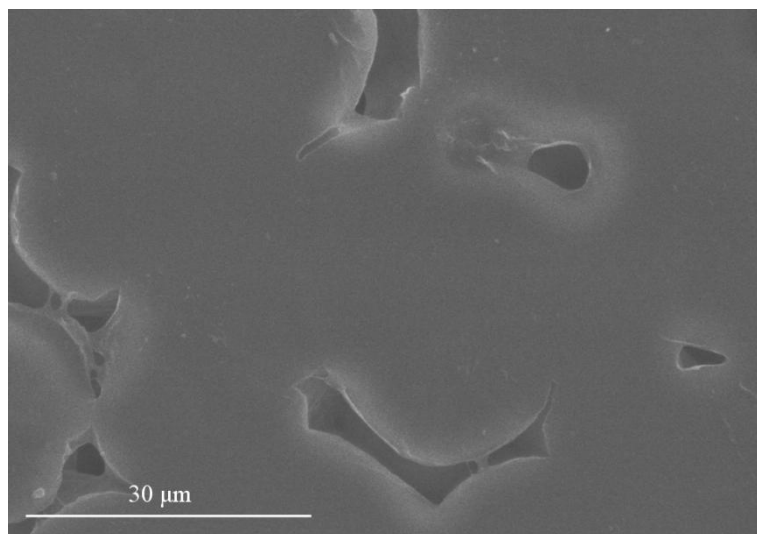

**Fig. S8** SEM image of bare PVDF.

**Fig. S9**

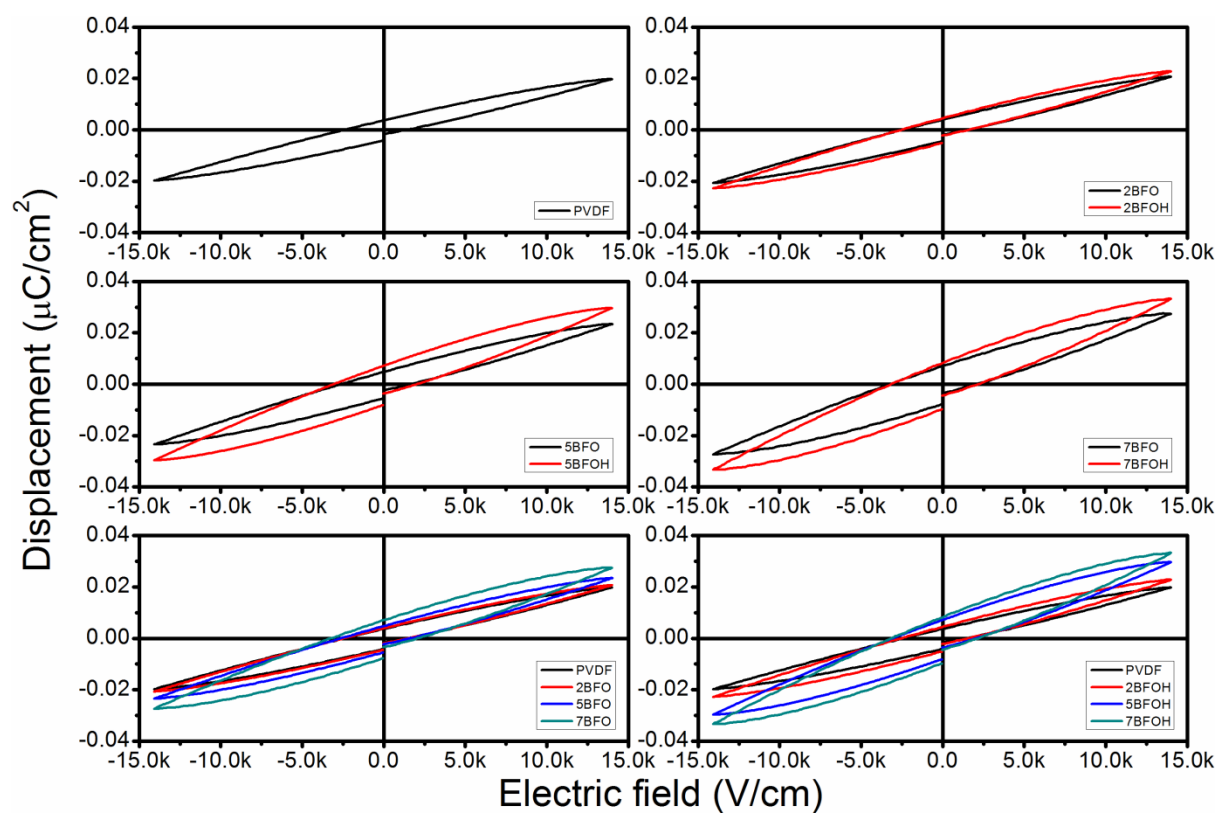

**Fig. S9** Comparison of D-E hysteresis loops of all the films in different ways.

**Fig. S10**

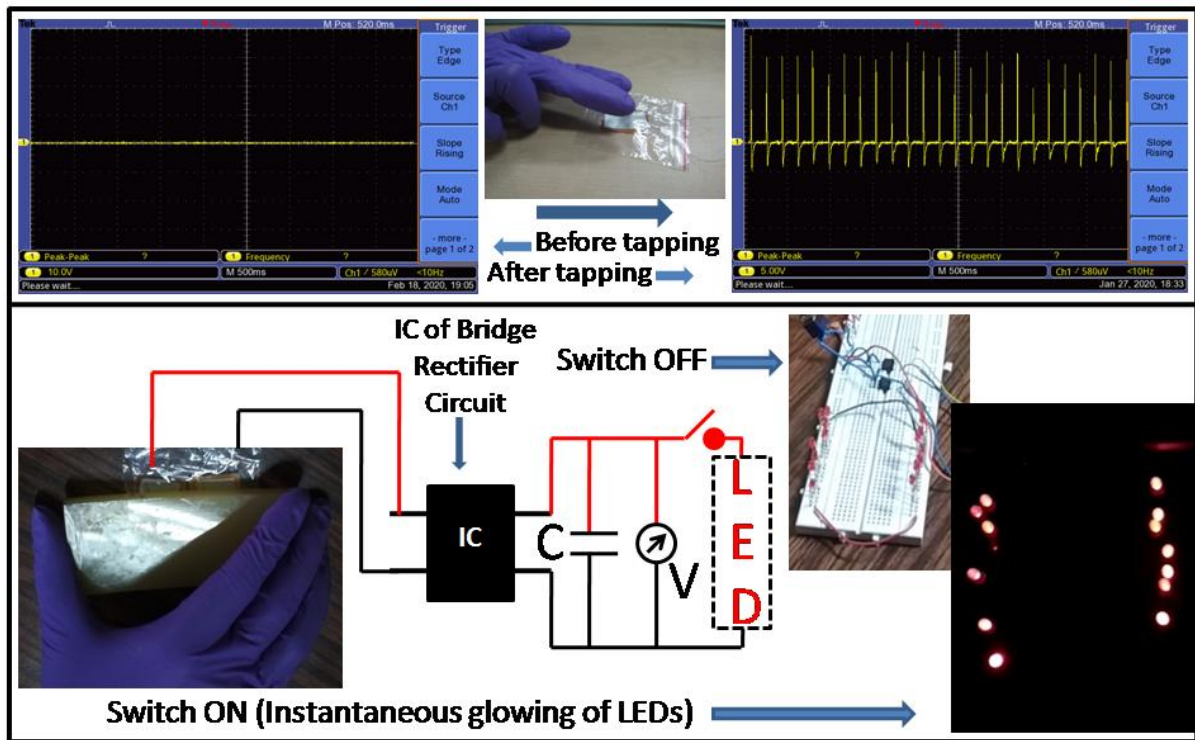

**Fig. S10** Schematic presentation of mechanical energy harvesting, capacitor charging and LED glowing experiments.

**Fig. S11**

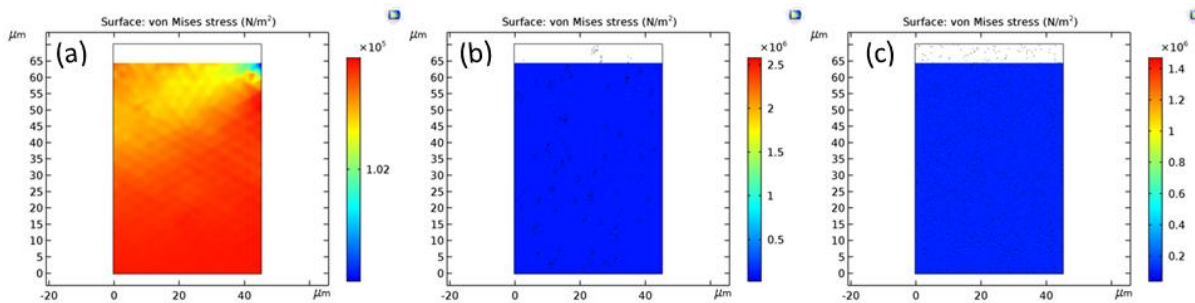

**Fig. S11** The colour map surface plot is showing the stress distribution in the cross section of (a) bare PVDF, (b) 7BFO and (c) 7BFOH films due to normally applied 0.3MPa pressure.
